# Supplementary material for: Light cross-linkable and pH de-cross-linkable drug nanocarriers for intracellular drug delivery
Source: Royal Society of Chemistry journal article supplement (doi:10.1039/c4py01420k), 2015-01-01
Supplement: c4py01420k1.pdf [file c4py01420k1.pdf]

## Light cross-linkable and pH de-cross-linkable drug nanocarriers for intracellular drug delivery

Fan Jia, Yin Wang, Haibo Wang, Qiao Jin\*, Tongjiang Cai, Yangjun Chen and Jian Ji\*

MOE Key Laboratory of Macromolecular Synthesis and Functionalization, Department of Polymer Science and Engineering, Zhejiang University, Hangzhou 310027, China

To whom correspondence should be addressed. E-mail: (Q. Jin) jinqiao@zju.edu.cn; Tel: +86-571-87953931 (J. Ji) jijian@zju.edu.cn; Tel: +86-571-87953729

### Determination of drug loading content and drug loading efficiency

1 mL of un-cross-linked drug loaded micelle solution was taken and freeze-dried. 2 mL dimethyl sulfoxide and 2 mL methanol was added to dissolve the residue. The UV-absorbance at 490 nm was recorded and the final concentration was calculated. (Standard curve:  $y = -0.057 + 15.552x$ ,  $R = 0.9998$ ; y: value of absorbance; x: concentration of DOX)

Drug loading content (DLC) and drug loading efficiency (DLE) were calculated according to the following equations.

$$\text{DLC (\%)} = (\text{weight of the loaded drug} / \text{weight of the polymer}) \times 100\%$$

$$\text{DLE (\%)} = (\text{weight of the loaded drug} / \text{weight in the feed}) \times 100\%$$

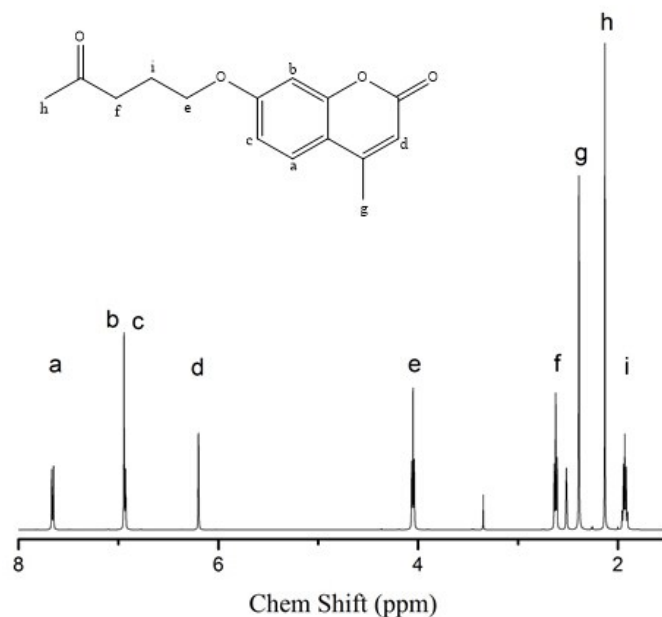

Fig. S1 <sup>1</sup>H NMR spectra of OMC in DMSO at 25 °C

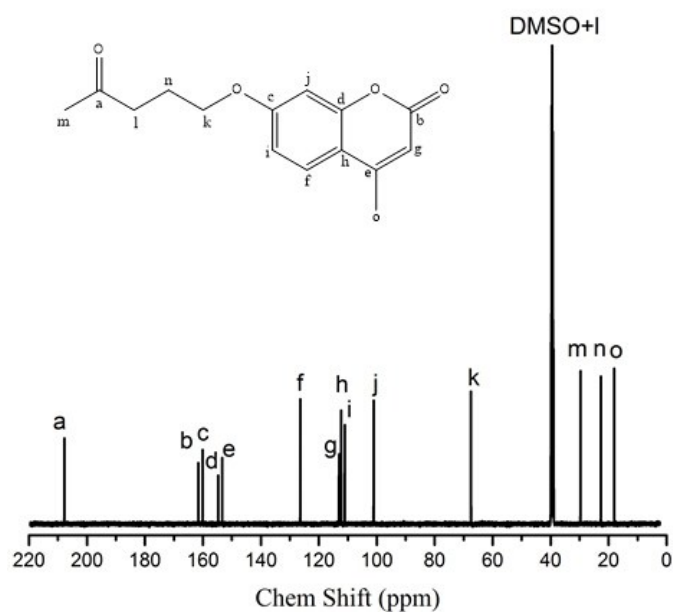

**Fig. S2**  $^{13}\text{C}$  NMR spectra of OMC in DMSO at 25 °C

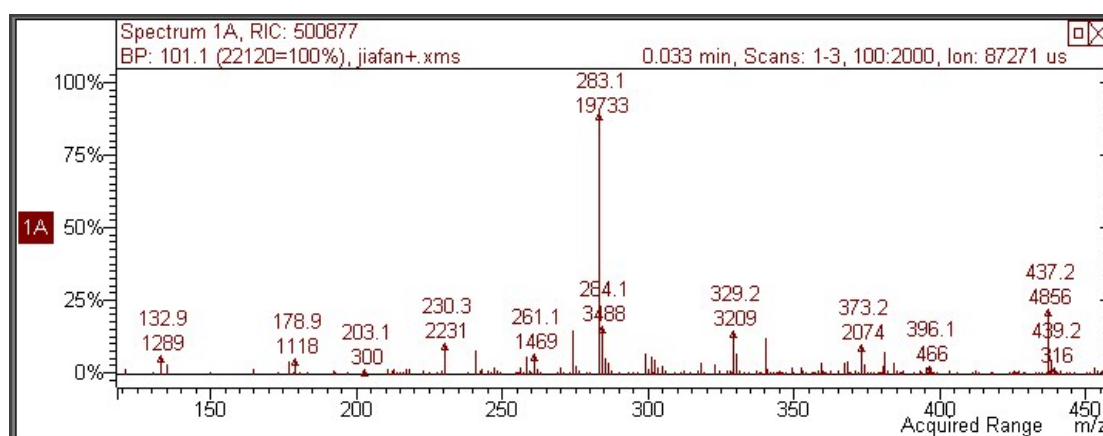

**Fig. S3** mass spectra for OMC, LCMS(ESI): calculated for  $\text{C}_{15}\text{H}_{16}\text{O}_4$  260.0, found 283.1 (+ $\text{Na}^+$ )

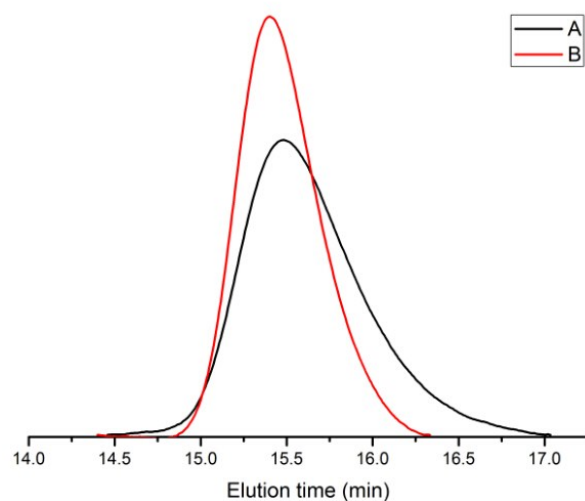

**Fig S4.** GPC profiles of polymers (A: mPEG; B: mPEG-PBLA; elution: DMF, PS standards)

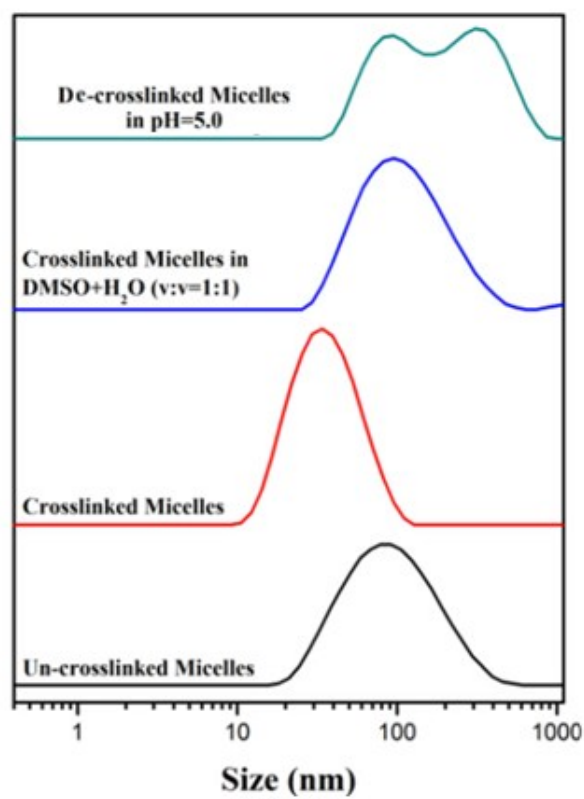

**Fig S5.** Size distribution of micelles under different conditions

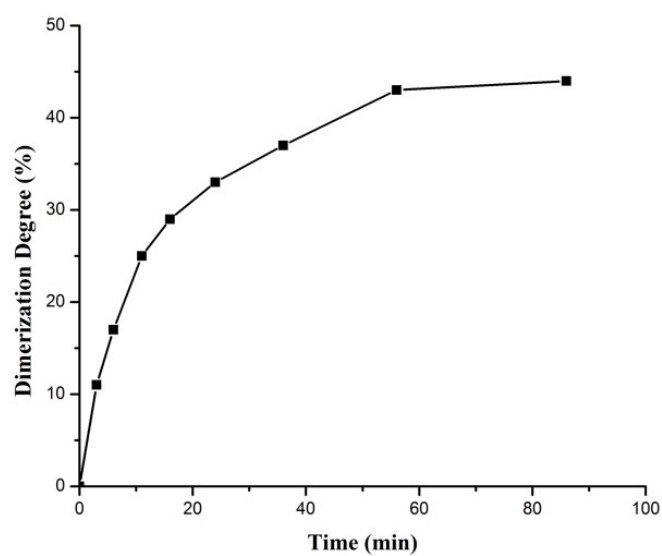

**Fig S6.** Dimerization degree of OMC groups

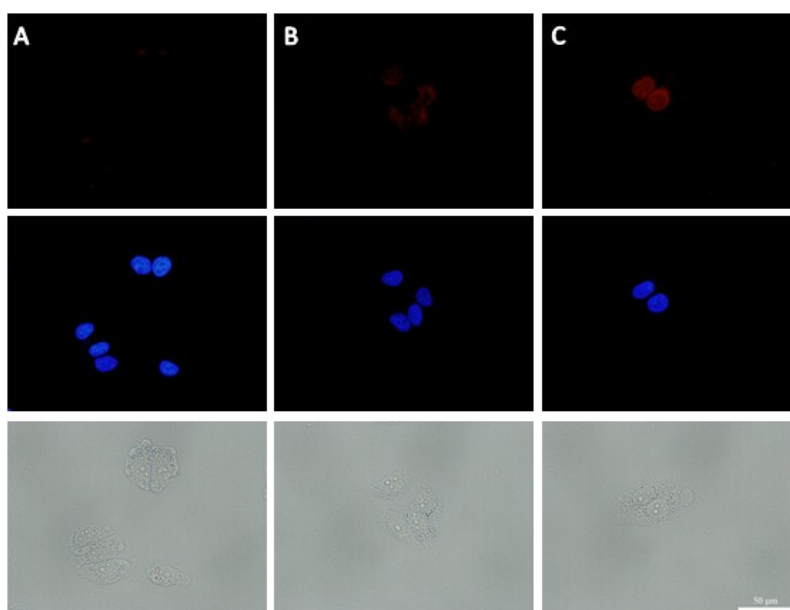

**Fig. S7** Fluorescence microscopy images of HepG2 incubated with un-crosslinked drug-loaded micelles for different times (A: 1 hour; B: 3 hours; C: 5 hours; Top: fluorescent images of DOX; Middle: fluorescent images of DAPI; Bottom: bright field images of HepG2 cells. Scale bar: 50  $\mu\text{m}$ )

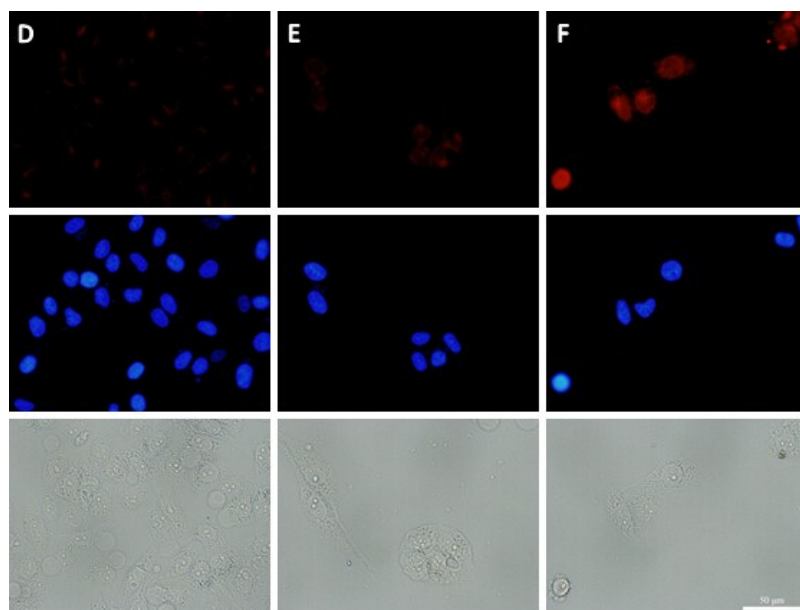

**Fig. S8** Fluorescence microscopy images of HepG2 incubated with crosslinked drug-loaded micelles for different times (D: 1 hour; E: 3 hours; F: 5 hours; Top: fluorescent images of DOX; Middle: fluorescent images of DAPI; Bottom: bright field images of HepG2 cells. Scale bar: 50  $\mu$ m)

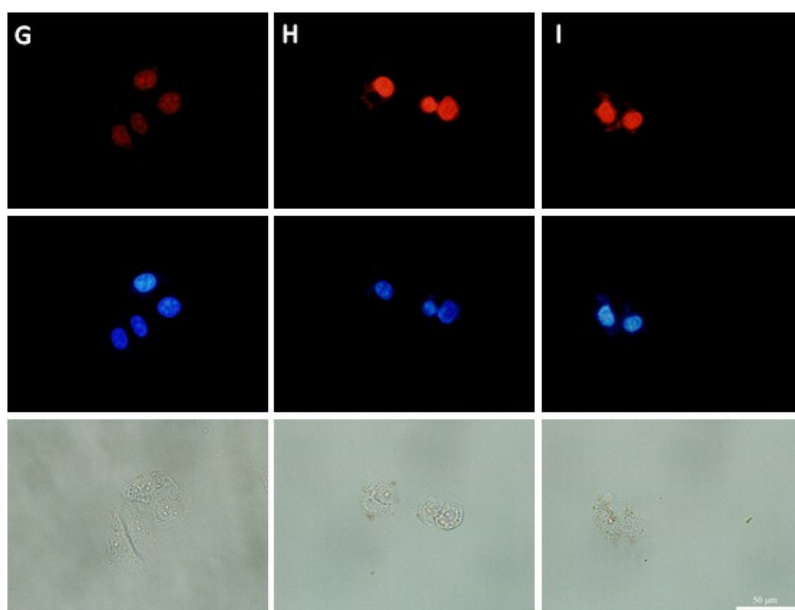

**Fig. S9** Fluorescence microscopy images of HepG2 incubated with free DOX for different times (G: 1 hour; H: 3 hours; I: 5 hours; Top: fluorescent images of DOX; Middle: fluorescent images of DAPI; Bottom: bright field images of HepG2 cells. Scale bar: 50  $\mu$ m)

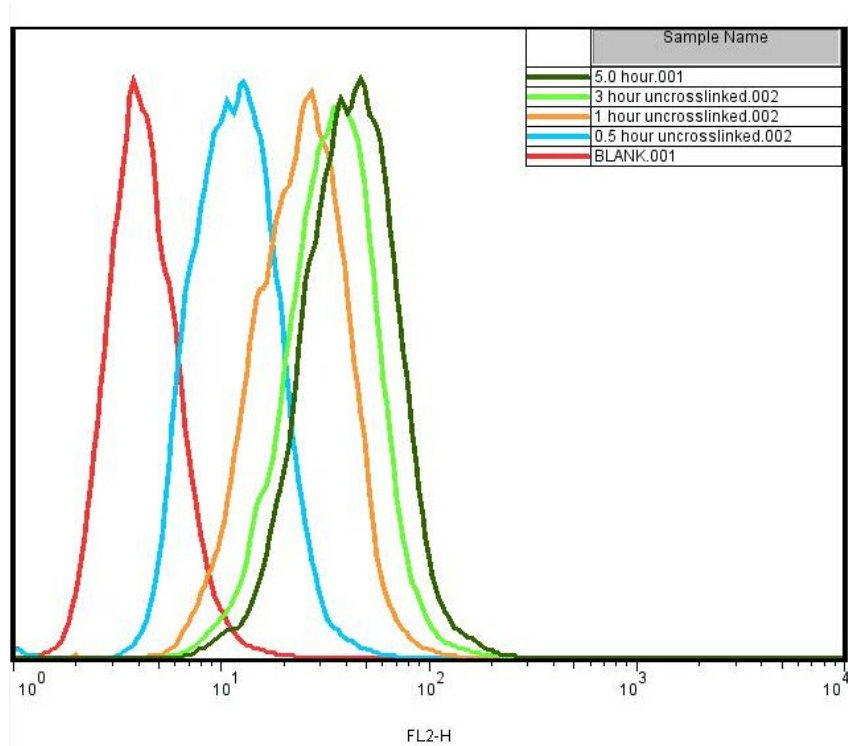

**Fig. S10** Flow cytometric profiles of HepG2 cells incubated with un-crosslinked drug-loaded micelles at different time intervals
